# Supplementary material for: Sunscreen Effect Exerted by Secondary Carotenoids and Mycosporine-like Amino Acids in the Aeroterrestrial Chlorophyte Coelastrella rubescens under High Light and UV-A Irradiation
Source: MDPI journal article supplement (doi:10.3390/plants10122601), 2021-11-26
Supplement: s1 [file s1]

## Supplementary S2. Chlorophyll *a* fluorescens induction curves of *Coelastrella rubescens* NAMSU R1 cells

Stationary chlorophyll fluorescence (CF) induction curves for assessment of non-photochemical quenching of the excited chlorophyll states were recorded in a quartz cell (2 mm pathlength) with Fluorpen FP100 s PAM-fluorimeter (Photon System Instruments, Czech Republic) after 15-min dark adaptation according to previously reported protocol [1]. Photon flux densities of the measuring and the saturating light were of 5 and of 3,000  $\mu\text{mol quanta/m}^2/\text{s}$ , respectively. CF was excited by a light-emitting diode ( $\lambda = 455 \pm 5 \text{ nm}$ ) and detected within the range of 697–750 nm. Optical aperture diameter was of 5 mm. To induce regulatory non-photochemical quenching of the excited chlorophyll states, dark-adapted cells were exposed to actinic light of high photon flux density ( $\lambda = 455 \pm 5 \text{ nm}$ , 800  $\mu\text{mol quanta/m}^2/\text{s}$ ), saturation pulse. was applied each 12 s during acclimation to actinic light for detection of maximal CF intensity in the light-adapted state ( $F_m'$ ). Before actinic light exposure,  $F_o$  and  $F_m$  values were registered. Representative CF induction curves of *C. rubescens* NAMSU R1 treated by low light (50  $\mu\text{mol/m}^2/\text{s}$ ) (Figure S2a), treated by high light (150  $\mu\text{mol/m}^2/\text{s}$ ) (Figure S2b), c - treated by high light (150  $\mu\text{mol/m}^2/\text{s}$ ) and UV-A (2.9  $\text{W/m}^2$ ) (Figure S2c). There were a total of 5 flashes of saturation light during actinic light illumination. Representative Following parameters were calculated at each saturation light pulse during acclimation to the actinic light according to Lazár [2]: the Stern-Volmer NPQ parameter,

$$\text{NPQ} = \frac{F_m - F_m'}{F_m'}$$

the quantum yield of non-regulatory,  $\phi(\text{NO})$ , and regulatory,  $\phi(\text{NPQ})$ , dissipation,

$$\phi(\text{NO}) = \frac{F_t}{F_m'}$$

$$\phi(\text{NPQ}) = \phi(\text{NO}) \times \text{NPQ},$$

where  $F_t$  is the stationary chlorophyll fluorescence intensity during actinic light acclimation,  $F_m$  and  $F_m'$  are maximal chlorophyll fluorescence intensity un the dark-acclimated and light-acclimated state, respectively. In addition, maximal PSII photochemical quantum yield was calculated as [2]

$$F_v/F_m = \frac{F_m - F_o}{F_m}$$

where  $F_o$  is the minimal chlorophyll fluorescence intensity in the dark-acclimated state. Calculated parameters of quenching of the excited chlorophyll states are presented in the Table S2.

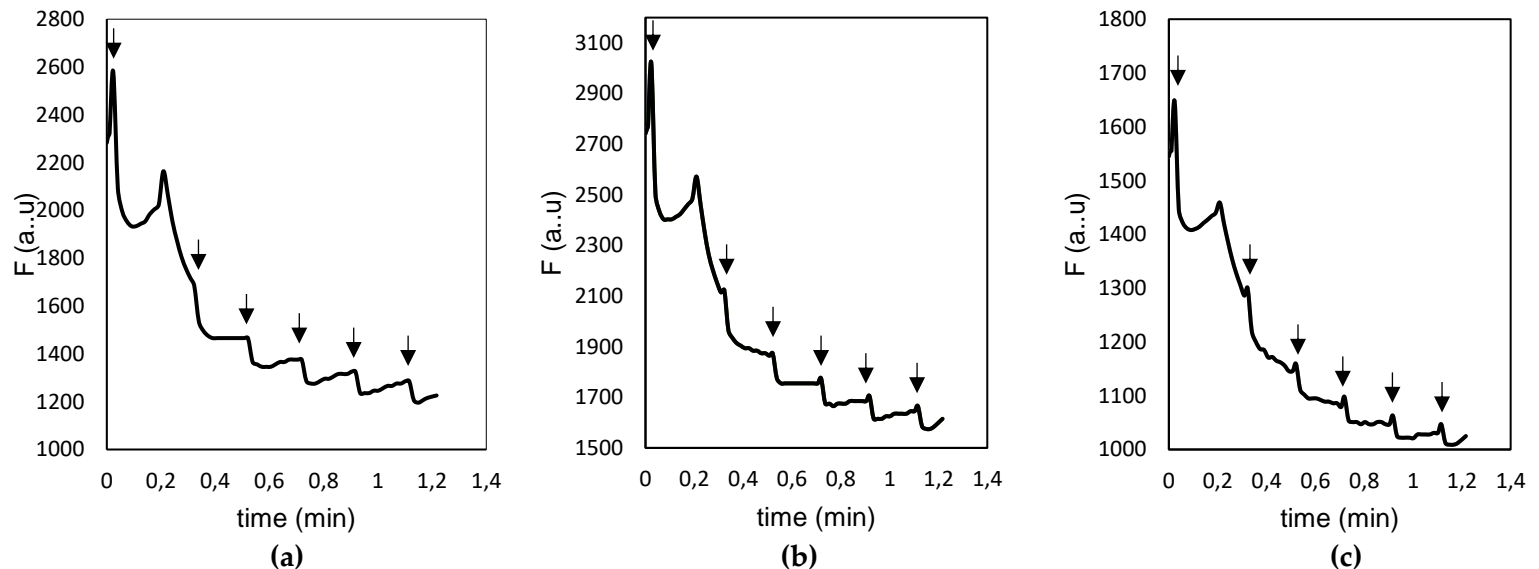

**Figure S2.** Representative inductive curves of chlorophyll *a* fluorescens induction of *Coelastrella rubescens* NAMSU R1 cells: a – treated by low light (50  $\mu\text{mol/m}^2/\text{s}$ ), b – treated by high light (150  $\mu\text{mol/m}^2/\text{s}$ ), c - treated by high light (150  $\mu\text{mol/m}^2/\text{s}$ ) and UV-A (2.9  $\text{W/m}^2$ ). a.u. – arbitrary units of chlorophyll fluorescence intensity. Arrows indicate saturation pulses.

Table S2. Calculated parameters of quenching of the excited chlorophyll states of the cells of *Coelastrella rubescens* NAMSU R1 at each saturation pulse. Average values from three replicates and their standard deviations are shown.  $\phi(\text{NO})$  – quantum yield of non-regulatory dissipation,  $\phi(\text{NPQ})$  – quantum yield of regulatory dissipation, NPQ – Stern-Volmer non-photochemical quenching parameter. \* - zero saturating pulse applied for dark-adapted cells; in this case,  $\phi(\text{NO})$  was calculated as  $1-F_v/F_m$ ,  $\phi(\text{NPQ})$  and were assumed as 0.

| # of pulse | $\phi(\text{NO})$ |           |           | $\phi(\text{NPQ})$ |           |           | NPQ       |           |           |
|------------|-------------------|-----------|-----------|--------------------|-----------|-----------|-----------|-----------|-----------|
|            | LL                | HL        | HL+UV     | LL                 | HL        | HL+UV     | LL        | HL        | HL+UV     |
| 0*         | 0,83±0.15         | 0,83±0.04 | 0,92±0.01 | 0                  | 0         | 0         | 0         | 0         | 0         |
| 1          | 0,47±0.16         | 0,65±0.13 | 0,66±0.06 | 0,34±0.21          | 0,40±0.11 | 0,23±0.05 | 0,40±0.18 | 1,06±0.32 | 0,35±0.07 |
| 2          | 0,39±0.12         | 0,50±0.05 | 0,52±0.04 | 0,36±0.20          | 0,44±0.08 | 0,28±0.06 | 0,62±0.26 | 1,31±0.34 | 0,53±0.09 |
| 3          | 0,34±0.10         | 0,46±0.06 | 0,45±0.06 | 0,37±0.22          | 0,45±0.05 | 0,29±0.08 | 0,74±0.34 | 1,42±0.37 | 0,62±0.11 |
| 4          | 0,35±0.09         | 0,44±0.06 | 0,41±0.02 | 0,38±0.19          | 0,45±0.09 | 0,28±0.06 | 0,82±0.36 | 1,49±0.38 | 0,67±0.11 |
| 5          | 0,32±0.11         | 0,42±0.14 | 0,46±0.01 | 0,32±0.02          | 0,36±0.13 | 0,30±0.02 | 0,88±0.37 | 1,54±0.39 | 0,69±0.12 |

## References

1. Chekanov, K.; Lobakova, E. Photosynthesis measurements on the upper and lower side of the thallus of the foliose lichen *Nephroma arcticum* (L.) Torss. *Photosynth Res* **2021**, *149*(3), 289-301.
2. Lazár, D. Parameters of photosynthetic energy partitioning. *J Plant Physiol* **2015**, *175*, 131-147.
