# Supplementary material for: Sunscreen Effect Exerted by Secondary Carotenoids and Mycosporine-like Amino Acids in the Aeroterrestrial Chlorophyte Coelastrella rubescens under High Light and UV-A Irradiation
Source: MDPI journal article supplement (doi:10.3390/plants10122601), 2021-11-26
Supplement: s1 [file s1]

## Supplementary S5. Selection of the elution parameters for the analysis of the water-methanol extracts of *Coelastrella rubescens* NAMSU R1 by UPLC-MS

The cells of *Coelastrella rubescens* NAMSU R1 incubated under high light (150  $\mu\text{mol}/\text{m}^2/\text{s}$ ) and UV-A (2.9  $\text{W}/\text{m}^2$ ) at 25 °C for three weeks were taken for the analysis because they were characterized by high absorbance in the UV range putatively corresponded to mycosporine-like amino acids (MAA). Water-methanol extracts were prepared according to Folch et al. [1]. For separation by ultra-performance liquid chromatography (UPLC), The samples were incubated at 40 °C in a rotary evaporator to remove methanol, dissolved in 1 mL of deionized water prepared on a Simplicity UV water purification system (Millipore, France) and filtered using 0.45  $\mu\text{m}$  CAMEO 17F (Sigma-Aldrich, St. Louis, USA). A column ACQUITY UPLC BEH C18, 50 $\times$ 2,1 mm, 1,7  $\mu\text{m}$ , (Waters, Massachusetts, USA) was used. The samples were separated at the temperature of 40 °C and the volumetric flow rate of 0.4 mL/min.

Four different separation protocols were studied (Table S5) they different by the composition of system of solvents for elution and elution profile. Due to high hydrophilicity, MAA are eluted from reverse-phase columns by  $\text{CH}_3\text{CN}$  or  $\text{H}_2\text{O}$  solvents and near the retention volume of non-sorbing components [2]. Elution system consisted of two main components, A and B. The component A in all cases was presented by 0.1% (v/v)  $\text{HCOOH}$  in  $\text{H}_2\text{O}$ . The component B was either 0.1% (v/v)  $\text{HCOOH}$  in  $\text{CH}_3\text{OH}$  or 0.1% (v/v)  $\text{HCOOH}$  in  $\text{CH}_3\text{CN}$ .

**Table S5.** Different protocols of separation of *Coelastrella rubescens* NAMSU R1 water-methanol extracts by UPLC. The composition of the component B, its content and elution time are presented. \* - protocol selected for the analysis by UPLC-MS.

| Protocol | Component B                                         | Content of component B, % (v/v)         | Elution time, min |
|----------|-----------------------------------------------------|-----------------------------------------|-------------------|
| 1        | 0.1% (v/v) $\text{HCOOH}$ in $\text{CH}_3\text{CN}$ | 0 $\rightarrow$ 2                       | 0-5               |
| 2        | none                                                | none                                    | 0-5               |
| 3        | 0.1% (v/v) $\text{HCOOH}$ in $\text{CH}_3\text{OH}$ | 0 $\rightarrow$ 5<br>5 $\rightarrow$ 10 | 0-1<br>1-5        |
| 4*       | 0.1% (v/v) $\text{HCOOH}$ in $\text{CH}_3\text{OH}$ | 0 $\rightarrow$ 2                       | 0-5               |

The extracts of *C. rubescens* were characterized by presence of highly hydrophilic components, which eluted by water with minimal fraction of organic compounds which is in accordance with existing data on MAA [2]. Only one pronounced peak was observed in the chromatogram obtained by the protocols 1 (Figure S5a) and 3 (Figure S5b). At the same time, at least three components were revealed in the chromatograms obtained by the protocols 2 (Figure S5c) and 4 (Figure S5d). Due to better separation of peaks the protocol 4 was selected to subsequent UHPLC-MS analysis.

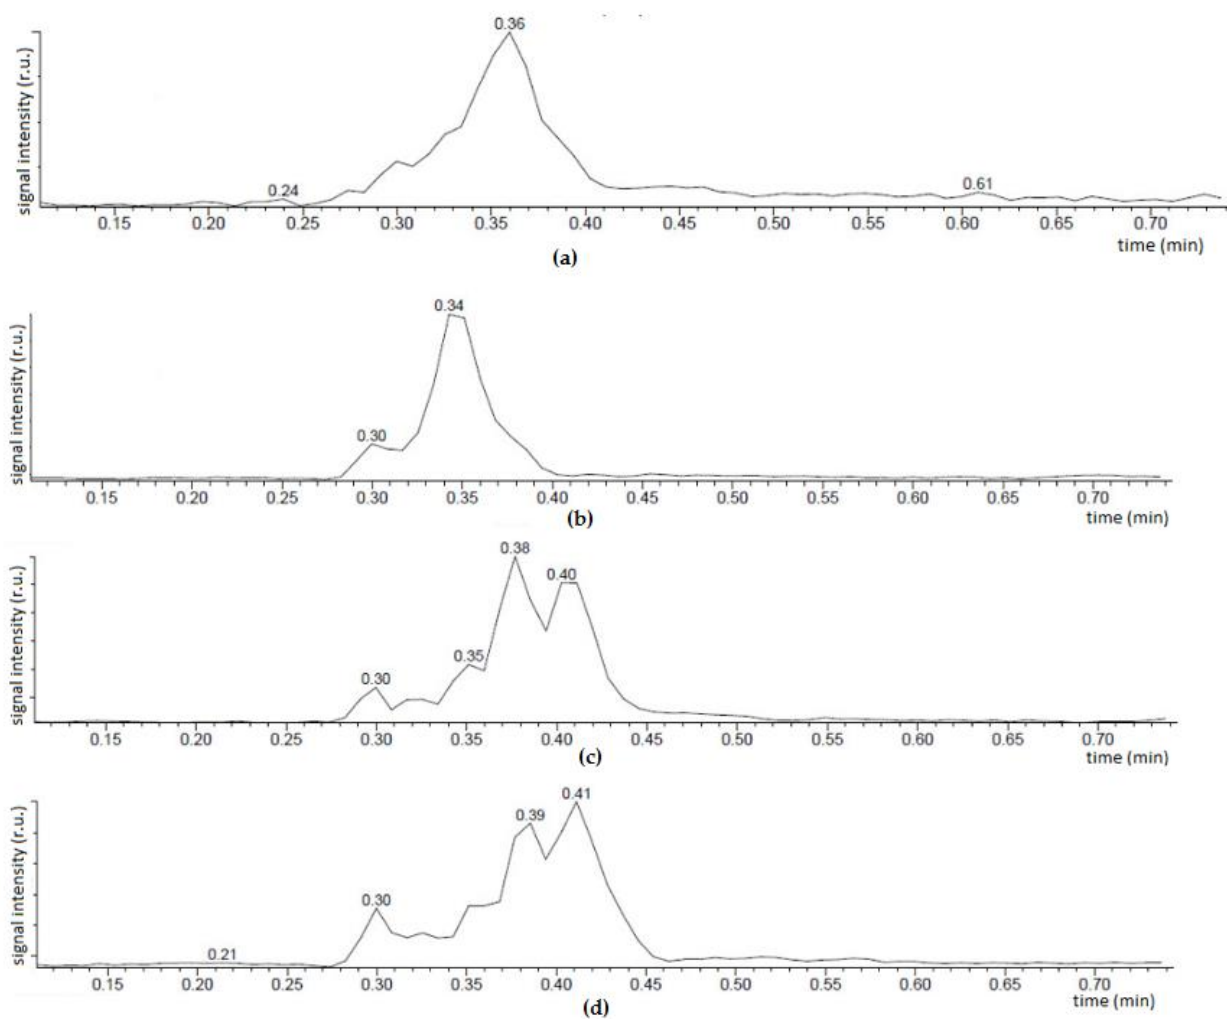

**Figure S5.** Chromatograms of the water-methanol extracts of *Coelastrella rubescens* NAMSU R1 treated by HL+UV-A obtained by UPLC protocols 1 (a), 3( b), 2 (c) and 4(d).

#### References

1. Folch, J.; Lees, M.; Stanley, G.S. A simple method for the isolation and purification of total lipides from animal tissues. *J Biol Chem* **1957**, *226*, 497–509.
2. Parailoux, M.; Godin, S.; Fernandes, S.; Lobinski, R. Untargeted Analysis for Mycosporines and Mycosporine-Like Amino Acids by Hydrophilic Interaction Liquid Chromatography (HILIC)—Electrospray Orbitrap MS<sup>2</sup>/MS<sup>3</sup>. *Antioxidants* **2020**, *9*(12), 1185.
