# Supplementary material for: Sunscreen Effect Exerted by Secondary Carotenoids and Mycosporine-like Amino Acids in the Aeroterrestrial Chlorophyte Coelastrella rubescens under High Light and UV-A Irradiation
Source: Plants (Basel). 2021 Nov 26;10(12):2601. doi: 10.3390/plants10122601 (PMC8704241; doi:10.3390/plants10122601)
Supplement: Supplementary file 1 [file plants-10-02601-s001.zip]

Archive with 5 entries (5 files):
- Supplementary S1.pdf
- Supplementary S2.pdf
- Supplementary S3.pdf
- Supplementary S4.pdf
- Supplementary S5.pdf
